# Supplementary material for: Effects of time and temperature during melanging on the volatile profile of dark chocolate
Source: PubMed Central journal article supplement (PMC7483446; doi:10.1038/s41598-020-71822-0), 2020-09-10
Supplement: 41598_2020_71822_MOESM1_ESM.pdf [file 41598_2020_71822_MOESM1_ESM.pdf]

**TITLE:** Effects of Time and Temperature During Melanging on the Volatile Profile of Dark Chocolate

**AUTHORS**

Caitlin Clark<sup>1\*</sup>, Harmonie M Bettenhausen<sup>2</sup>, Linxing Yao<sup>3</sup>, Adam L Heuberger<sup>2</sup>, Martha Stone<sup>1</sup>, Jeffrey Miller<sup>1</sup>

**AFFILIATIONS**

1: Department of Food Science and Human Nutrition, Colorado State University, Fort Collins, CO, USA; Nuance Chocolate, Fort Collins, CO

2. Department of Horticulture and Landscape Architecture, Colorado State University, Fort Collins, CO, USA

3: Proteomics and Metabolomics Facility, Colorado State University, Fort Collins, CO, USA

**Supplementary Table 1: Annotated Compounds**

| #  | Chemical Class       | Compound                                             | Common Name                  | Temp p-val | Time p-value | Temp*Time p-val | Aroma/Flavor from literature                                                       | Database ** |
|----|----------------------|------------------------------------------------------|------------------------------|------------|--------------|-----------------|------------------------------------------------------------------------------------|-------------|
| 6  | <b>Alcohols (1°)</b> | 1-Pentanol                                           |                              | 6.51E-05   | 7.23E-27     | 2.18E-06        | Oil, balsamic, vanilla, fusel, sweet, balsam                                       | a           |
| 13 |                      | 2-Furanmethanol                                      |                              | 1.29E-05   | 7.32E-18     | 1.76E-05        | Caramel, warm, cauliflower, vegetable, oily                                        | a           |
| 14 |                      | 2-Heptanol                                           |                              | 1.76E-02   | 2.65E-13     | 7.76E-02        | Leafy, coconut, herbal, peony, strawberry, musty, sweet, woody, violet, green      | a           |
| 17 |                      | 2-Nonanol                                            |                              | 4.47E-01   | 1.55E-03     | 6.74E-01        | Fatty, dusty, rose, fat, floral, green, clean, wet, orange, fresh, bitter, oily    | a           |
| 21 |                      | 2-Propyl-1-pentanol                                  |                              | 1.85E-15   | 6.09E-18     | 4.21E-10        | Found in feces                                                                     | b           |
| 42 |                      | Benzenemethanol, .alpha.-methyl-, (R)-Benzyl alcohol | Phenylethanol                | 1.88E-01   | 5.69E-04     | 2.58E-01        | Gardenia, fresh, sweet, hyacinth                                                   | a           |
| 44 |                      |                                                      |                              | 9.17E-16   | 1.44E-12     | 2.80E-12        | Berry, balsamic, rose, floral, walnut, sweet, cherry, phenolic, flower, grapefruit | a           |
| 76 |                      | Phenylethyl Alcohol                                  |                              | 1.40E-01   | 3.21E-05     | 3.69E-01        | Lilac, rose, rosewater, honey, floral, spice, bitter, dried rose                   | a           |
| 8  | <b>Alcohols (2°)</b> | 2,3-Butanediol                                       | Diacetyl                     | 6.57E-15   | 3.47E-12     | 2.06E-09        | Onion, fruit, creamy, buttery                                                      | a           |
| 24 |                      | 3-Hexene, 2,2-dimethyl-                              |                              | 1.07E-09   | 1.48E-26     | 4.95E-03        | Herbal, powerful, bitter, herb                                                     | a           |
| 16 | <b>Aldehydes</b>     | 2-Isopropyl-5-methylhex-2-enal                       | Isodihydroavandulyl aldehyde | 8.31E-04   | 6.85E-07     | 4.77E-01        | Mint, fresh, peppermint, sweet, cool, minty, green                                 | a           |

| #  | Chemical Class          | Compound                                            | Common Name   | Temp p-val | Time p-value | Temp*Time p-val | Aroma/Flavor from literature                                                       | Database ** |
|----|-------------------------|-----------------------------------------------------|---------------|------------|--------------|-----------------|------------------------------------------------------------------------------------|-------------|
| 19 |                         | 2-Octenal, (E)-                                     |               | 1.44E-14   | 1.34E-16     | 6.74E-09        | Nut, fat, herbal, fresh, green, fatty, banana, waxy, leafy, cucumber               | a           |
| 28 |                         | 5-Methyl-2-phenyl-2-hexenal                         | Cocal         | 1.27E-05   | 9.59E-10     | 3.38E-03        | Chocolate, bitter, butyric, cocoa, sweet, fruity, aldehydic, nut skin, green       | a           |
| 36 |                         | Benzaldehyde                                        |               | 4.93E-01   | 3.67E-19     | 3.22E-03        | Cherry, almond, sweet, burnt sugar, sharp, strong, bitter                          | a           |
| 37 |                         | Benzeneacetaldehyde                                 |               | 2.10E-03   | 3.30E-10     | 1.82E-04        | Cortex, radish, naricissus, sweet, beany, honey, cocoa, nutty                      | a           |
| 38 |                         | Benzeneacetaldehyde, .alpha.-(2-methylpropylidene)- |               | 4.48E-04   | 6.04E-08     | 1.59E-02        | Cortex, radish, naricissus, sweet, beany, honey, cocoa, nutty                      | a           |
| 39 |                         | Benzeneacetaldehyde, .alpha.-ethylidene-            |               | 2.60E-02   | 1.29E-06     | 6.96E-02        | Cortex, radish, naricissus, sweet, beany, honey, cocoa, nutty                      | a           |
| 45 |                         | Butanal, 3-methyl-                                  |               | 1.04E-03   | 3.14E-07     | 1.48E-08        | Peach, sour, chocolate, ethereal, malt, fatty, aldehydic                           | a           |
| 60 |                         | Heptanal                                            |               | 2.55E-26   | 4.11E-22     | 5.74E-20        | Citrus, ozone, fat, herbal, fresh, wine-lee, rancid, fatty, aldehydic, green       | a           |
| 62 |                         | Hexanal                                             |               | 5.77E-19   | 7.82E-20     | 8.03E-12        | Leafy, grass, sweaty, tallow, fat, fresh, fruity, aldehydic, green                 | a           |
| 67 |                         | Nonanal                                             |               | 1.26E-13   | 1.78E-15     | 5.03E-09        | Citrus, lime, orange peel, rose, fat, green, fishy, waxy, fresh, orris, grapefruit | a           |
| 69 |                         | Octanal                                             |               | 3.15E-09   | 2.25E-06     | 2.67E-05        | Lemon, citrus, soap, orange peel, fat, waxy, fatty, aldehydic, green               | a           |
| 12 | <b>Carboxylic acids</b> | 2-Butenoic acid, 3-methyl-                          | Crotonic acid | 2.62E-12   | 5.20E-14     | 2.43E-03        | Sour, sweat, acid, stinky, sweaty, animal, rancid, tropical, feet, cheese          | a           |
| 30 |                         | Acetic acid (Isomer 1)                              |               | 4.33E-02   | 8.87E-26     | 4.35E-02        | Sour, pungent, sharp, vinegar                                                      | a           |
| 32 |                         | Acetic acid (Isomer 2)                              |               | 3.65E-01   | 1.32E-10     | 1.68E-01        | Sour, pungent, sharp, vinegar                                                      | a           |
| 40 |                         | Benzeneacetic acid                                  |               | 3.04E-01   | 8.55E-07     | 1.69E-01        | Honeysuckle, sour, waxy, floral, sweet, honey, civet, flower                       | a           |
| 46 |                         | Butanoic acid                                       |               | 9.18E-06   | 1.36E-04     | 3.38E-03        | Butter, sweat, acetic, sharp, rancid, fruit, cheese                                | a           |
| 47 |                         | Butanoic acid, 3-methyl-                            |               | 2.86E-05   | 3.92E-14     | 1.73E-05        | Sour, sweat, acid, stinky, sweaty, animal, rancid, tropical, feet, cheese          | a           |
| 61 |                         | Heptanoic acid                                      |               | 3.28E-08   | 2.52E-11     | 3.78E-04        | Sour, cheesy, sweat, rancid                                                        | a           |
| 63 |                         | Hexanoic acid                                       |               | 5.16E-06   | 4.65E-13     | 2.85E-03        | Fatty, sour, sweat, cheese                                                         | a           |

| #  | Chemical Class      | Compound                                               | Common Name                    | Temp p-val | Time p-value | Temp*Time p-val | Aroma/Flavor from literature                                                       | Database ** |
|----|---------------------|--------------------------------------------------------|--------------------------------|------------|--------------|-----------------|------------------------------------------------------------------------------------|-------------|
| 68 |                     | Nonanoic acid                                          |                                | 3.11E-01   | 2.30E-03     | 7.67E-01        | Cultured dairy, fat, waxy, green, dirty, cheese                                    | a           |
| 70 |                     | Octanoic acid                                          |                                | 3.55E-01   | 1.15E-04     | 8.31E-01        | Cheesy, sweat, vegetable, waxy, fatty, rancid, oily                                | a           |
| 72 |                     | Pentanoic acid                                         |                                | 4.63E-14   | 2.98E-16     | 9.75E-08        | Sweat, putrid, sweaty, acidic, animal, rancid, sickening                           | a           |
| 73 |                     | Pentanoic acid, 4-methyl-                              |                                | 6.68E-07   | 1.18E-07     | 3.73E-04        | Cheesy, sweaty, acidic, sharp, animal, fruity, green                               | a           |
| 77 |                     | Propanoic acid, 2-methyl-                              |                                | 6.57E-03   | 1.91E-18     | 6.27E-03        | Rancid, butter, strawberry, cheese                                                 | a           |
| 4  | <b>Esters</b>       | 1-Butanol methyl ester                                 |                                | 8.14E-02   | 2.35E-25     | 5.42E-03        | Oil, alcoholic, burnt, whiskey, malt, banana, fusel, fruity                        | a           |
| 9  |                     | 2,3-Butanediol, diacetate                              |                                | 2.47E-01   | 1.79E-13     | 2.70E-03        | None                                                                               | c           |
| 20 |                     | 2-Pentanol acetate                                     |                                | 1.12E-03   | 4.16E-24     | 3.82E-05        | Overripe fruit, banana, sweet, peanut, juicy                                       | a           |
| 31 |                     | Acetic acid, 2-phenylethyl ester                       | Phenylethyl acetate (Isomer 1) | 2.31E-02   | 3.15E-07     | 9.26E-02        | Bitter, rhubarb, gardenia, musty, floral, green, sweet, herbal, leafy, fruity      | a           |
| 41 |                     | Benzoic acid, ethyl ester                              | Ethyl phenylacetate            | 6.42E-02   | 2.20E-06     | 9.54E-02        | Grapefruit, balsam, rose, anise, chocolate, honey, melon, sweet, floral, raspberry | a           |
| 43 |                     | Benzoic acid, 1-methylpropyl ester                     | Isobutyl benzoate              | 1.36E-03   | 2.91E-08     | 2.78E-02        | Powdery, musty, sweet, fruity, balsam                                              | a           |
| 49 |                     | Dibutyl phthalate                                      |                                | 1.91E-01   | 1.83E-01     | 6.35E-01        | Faint                                                                              | a           |
| 52 |                     | Dodecanoic acid, ethyl ester                           |                                | 1.75E-07   | 1.32E-12     | 5.30E-04        | Apple, brandy, waxy, grape, oily, sweet, fruity, pear                              | a           |
| 71 |                     | Octanoic acid, ethyl ester                             |                                | 8.41E-02   | 2.30E-06     | 2.25E-01        | Waxy, green, sweet, orange, aldehydic, vegetal, herbal                             | c           |
| 75 |                     | Phenylethyl Acetate (Isomer 2)                         |                                | 6.42E-02   | 2.20E-06     | 9.54E-02        | Bitter, rhubarb, gardenia, musty, floral, green, sweet, herbal, leafy, fruity      | a           |
| 51 | <b>Hydrocarbons</b> | Dodecane                                               |                                | 6.99E-06   | 7.44E-07     | 3.21E-04        | Alkane                                                                             | a           |
| 5  | <b>Ketones</b>      | 1H-2-Benzopyran-1-one, 3,4-dihydro-8-hydroxy-3-methyl- | Mellein                        | 2.08E-04   | 3.76E-09     | 2.64E-02        | None                                                                               | c           |
| 10 |                     | 2-Benzylcyclohexanone                                  |                                | 2.17E-05   | 4.68E-10     | 4.00E-03        | Irritant                                                                           | c           |
| 11 |                     | 2-Butanone, 1-(2-furanyl)-3-methyl-                    |                                | 1.27E-10   | 3.74E-13     | 2.67E-07        | Bitter, roasted                                                                    | c           |
| 15 |                     | 2-Heptanone                                            |                                | 8.63E-05   | 5.75E-27     | 2.49E-03        | Coconut, Soap, Herbal, Sweet,                                                      | a           |

| #  | Chemical Class           | Compound                                            | Common Name            | Temp p-val | Time p-value | Temp*Time p-val | Aroma/Flavor from literature                                                    | Database ** |
|----|--------------------------|-----------------------------------------------------|------------------------|------------|--------------|-----------------|---------------------------------------------------------------------------------|-------------|
| 18 |                          | 2-Nonanone                                          |                        | 3.18E-01   | 6.41E-09     | 2.64E-02        | Woody, Fruity, Spicy, Cinnamon Soap, herbal, hot milk, earthy, soapy, weedy     | a           |
| 22 |                          | 3,4-Dihydro-6-methyl-2H-pyran-2-one                 | Ethanone (Isomer 1)    | 3.63E-03   | 1.26E-06     | 2.33E-01        | Nutty, roasted, cooked                                                          | a           |
| 25 |                          | 3-Methylcyclopentane-1,2-dione                      | Methylcyclopentenolone | 7.24E-06   | 6.48E-06     | 7.90E-01        | Heated sugar, caramel, roasted, cooked, maple syrup                             | c           |
| 26 |                          | 4-Heptanone, 3-methyl-                              |                        | 3.20E-04   | 3.21E-04     | 3.14E-01        | Apple, banana, cheesy                                                           | c           |
| 35 |                          | Acetophenone                                        |                        | 2.96E-17   | 1.06E-16     | 5.89E-11        | Mimosa, hawthorn, sweet, acacia, almond, pungent, flower, bitter, must          | a           |
| 53 |                          | Ethanone, 1-(2-furanyl)-                            | Ethanone (Isomer 2)    | 2.28E-04   | 4.74E-27     | 1.35E-04        | Caramel, tobacco, balsamic, potato, coffee, cocoa, peanut, balsam, almond, beef | c           |
| 54 |                          | Ethanone, 1-(3,5-dimethylpyrazinyl)-                | Ethanone (Isomer 3)    | 8.46E-03   | 4.77E-06     | 2.48E-01        | Nutty, hazelnut, caramel, roasted, coffee, woodsmoke                            | a           |
| 27 | <b>Ketones, Alcohols</b> | 4H-Pyran-4-one, 2,3-dihydro-3,5-dihydroxy-6-methyl- | DDMP                   | 4.94E-01   | 3.54E-01     | 3.53E-01        | Sweet, bready, cookies, dried fruit                                             | b           |
| 34 |                          | Acetoin (Isomer 2)                                  |                        | 4.87E-13   | 3.70E-20     | 6.84E-07        | Butter, cream, milky, fatty, creamy, sweet, dairy                               | a           |
| 33 |                          | Acetoin (Isomer 1)                                  |                        | 1.57E-01   | 2.15E-21     | 4.48E-06        | Butter, cream, milky, fatty, creamy, sweet, dairy                               | a           |
| 48 | <b>Lactones</b>          | Butyrolactone                                       |                        | 1.87E-09   | 7.19E-19     | 1.14E-01        | Caramel, oily, fatty, sweet, creamy                                             | a           |
| 7  | <b>MRP*</b>              | 2,3,5-Trimethyl-6-ethylpyrazine                     |                        | 5.00E-02   | 1.36E-03     | 9.12E-01        | Roasted, baked potato, cooked                                                   | c           |
| 23 |                          | 3-Acetyl-1H-pyrroline                               | 3AP                    | 3.15E-02   | 3.48E-03     | 3.48E-01        | Dry, sweet, woody, hawthorn, nutty, popcorn, phenolic                           | a           |
| 55 |                          | Furan, 2-acetyl                                     |                        | 2.28E-04   | 4.74E-27     | 1.35E-04        | Caramel, tobacco, balsamic, potato, coffee, cocoa, peanut, balsam, almond, beef | a           |
| 56 |                          | Furan, 2-pentyl-                                    |                        | 1.40E-18   | 1.80E-16     | 2.41E-12        | Butter, green bean, vegetable, earthy, beany, fruity, metallic, green           | a           |
| 57 |                          | Furaneol                                            | Strawberry furone      | 9.90E-08   | 3.92E-10     | 6.35E-01        | Sweet, burnt, brown, caramellic, cotton candy                                   | c           |
| 58 |                          | Furfural                                            |                        | 2.92E-09   | 1.80E-22     | 3.79E-05        | Sweet, brown, woody, bready, caramellic, with a slight phenolic nuance          | c           |
| 59 |                          | Furfural, 5-methyl                                  |                        | 1.29E-10   | 3.74E-13     | 2.67E-07        | Caramellic, brown                                                               | c           |

| #  | Chemical Class          | Compound                                                | Common Name            | Temp p-val | Time p-value | Temp*Time p-val | Aroma/Flavor from literature                                                      | Database ** |
|----|-------------------------|---------------------------------------------------------|------------------------|------------|--------------|-----------------|-----------------------------------------------------------------------------------|-------------|
| 66 |                         | Maltol                                                  |                        | 1.87E-09   | 3.28E-26     | 2.20E-03        | Caramel, jam, bread, cotton, sweet, fruity, baked, candy                          | a           |
| 78 |                         | Pyrazine, 2,3-dimethyl-                                 |                        | 2.29E-01   | 6.32E-25     | 2.42E-04        | Butter, caramel, nut, peanut butter, meat, leather, coffee, cocoa, almond, walnut | a           |
| 79 |                         | Pyrazine, 2,5-dimethyl-                                 |                        | 8.14E-01   | 7.31E-25     | 7.35E-04        | Roast beef, roasted nuts, grass, medical, cocoa, woody, medicinal                 | a           |
| 80 |                         | Pyrazine, 2,6-diethyl-                                  |                        | 8.86E-02   | 3.55E-09     | 1.89E-01        | Nutty, vegetable, meaty, baked                                                    | a           |
| 81 |                         | Pyrazine, 2,6-dimethyl-                                 |                        | 7.18E-01   | 3.69E-25     | 5.55E-04        | Roast beef, roasted nuts, coffee, cocoa, roasted nut                              | a           |
| 82 |                         | Pyrazine, 2-ethyl-5-methyl-                             |                        | 7.75E-01   | 2.95E-18     | 3.84E-05        | Bean, fruit, sweet, coffee                                                        | a           |
| 83 |                         | Pyrazine, 3-ethyl-2,5-dimethyl-                         |                        | 3.31E-01   | 5.32E-10     | 1.21E-01        | Roast, roasted, potato, cocoa, nutty                                              | a           |
| 84 |                         | Pyrazine, methyl-                                       |                        | 8.48E-09   | 1.58E-30     | 5.49E-06        | Chocolate, roasted, cocoa, peanut, nutty, popcorn, green                          | a           |
| 85 |                         | Pyrazine, tetramethyl-                                  |                        | 3.60E-01   | 3.62E-09     | 6.61E-01        | Chocolate, burnt, lard, musty, coffee, cocoa, soybean, nutty                      | a           |
| 86 |                         | Pyrazine, trimethyl-                                    |                        | 9.76E-01   | 2.65E-17     | 3.55E-04        | Hazelnut, roasted, powdery, potato, musty, earthy, cocoa, peanut, nutty           | a           |
| 87 |                         | Styrene                                                 |                        | 8.76E-21   | 8.92E-14     | 9.83E-16        | Balsamic, gasoline, floral, sweet, plastic                                        | a           |
| 74 | <b>Phenols</b>          | Phenol, 2-methoxy-                                      |                        | 9.48E-02   | 3.94E-02     | 7.98E-01        | Spice, vanilla, smoky, sweet, woody, phenolic, medicinal, smoke                   | a           |
| 50 | <b>Sulfur Compounds</b> | Disulfide, dimethyl                                     |                        | 1.14E-06   | 5.26E-22     | 1.23E-07        | Fruity, herbal, vegetal, sulfurous, fatty, floral, nutty, meaty, spicy            | a           |
| 1  | <b>Terpenes</b>         | (3R,6S)-2,2,6-Trimethyl-6-vinyltetrahydro-2H-pyran-3-ol | Linalool (Isomer 1)    |            |              |                 | Floral, fresh, lavender                                                           | a           |
| 29 |                         | 6,6-Dimethyl-2-vinylidenebicyclo[3.1.1]heptane          | Beta-pinene (Isomer 2) | 3.58E-04   | 1.04E-04     | 7.68E-01        | Resinous, fresh, green, hay, woody, pine, dry                                     | a           |
| 2  |                         | Alpha-Pinene                                            |                        | 2.57E-03   | 5.41E-17     | 4.00E-01        | Harsh, turpentine, minty, fresh, earthy, sweet, woody, terpene, pine, camphor     | a           |
| 3  |                         | Beta-Pinene (Isomer 1)                                  |                        | 6.55E-02   | 5.89E-21     | 5.00E-02        | Resinous, resin, turpentine, green, hay, woody, pine, dry                         | a           |
| 64 |                         | Limonene                                                |                        | 4.19E-06   | 2.08E-12     | 3.08E-08        | Mint, lemon, citrus, orange, fresh, sweet                                         | a           |
| 65 |                         | Linalool (Isomer 2)                                     |                        | 1.22E-01   | 5.75E-10     | 2.48E-01        | Citrus, lemon, orange, floral, sweet,                                             | a           |

| #  | Chemical Class | Compound                        | Common Name | Temp p-val | Time p-value | Temp*Time p-val | Aroma/Flavor from literature                                       | Database ** |
|----|----------------|---------------------------------|-------------|------------|--------------|-----------------|--------------------------------------------------------------------|-------------|
| 88 |                | Trans-Linalool oxide (furanoid) |             | 5.50E-01   | 9.23E-08     | 1.15E-01        | woody, blueberry, bois de rose, lavender, green<br>Floral, flowers | a           |

\*MRP = Maillard Reaction Product

\*\* = a – Flavor DB, b – HMDB, c – Good Scents Company
